# Supplementary material for: Hierarchical porous biochar with ultra-high specific surface area for rapid removal of antibiotics from water
Source: Royal Society of Chemistry journal article supplement (doi:10.1039/d1nj02686k), 2021-01-01
Supplement: d1nj02686k1.pdf [file d1nj02686k1.pdf]

## Supporting Information

### **Hierarchical porous biochar with ultra-high specific surface area for rapid removal of antibiotics from water**

Shujian Liu, Yi Wang, Zhongmin Feng, Yun Wang\*, Ting Sun\*

*College of Sciences, Northeastern University, 3-11, Wenhua Road, Shenyang, Liaoning, 110819, China.*

\* Corresponding Authors: [wyun1989@126.com](mailto:wyun1989@126.com) (Yun Wang);

[sun1th@163.com](mailto:sun1th@163.com) (Ting Sun)

## **Chemicals and materials**

Onion skin was collected from vegetable market in Kaiyuan. Ofloxacin (OFL), norfloxacin (NOR), ciprofloxacin (CIP), sulfadiazine (SDZ), tylosin (TYL), tetracycline hydrochloride (TCH) and KOH were purchased from Shanghai Aladdin Bio-Chem Technology Co., LTD (China). Chlortetracycline hydrochloride ( $C_{22}H_{23}ClN_2O_8 \cdot HCl$ , CTC) and oxytetracycline hydrochloride ( $C_{22}H_{24}N_2O_9 \cdot HCl$ , 95%, OTC) were bought from Macklin Biochemical Co., Ltd (China). Hydrochloric acid (HCl) was obtained from Sinopharm Chemical Reagent Co., Ltd (Shanghai, China). All chemicals were analytical grade and used directly.

## **Characterization**

The specific surface area was calculated by the Brunauer-Emmett-Teller (BET) method and the pore size distribution was analyzed using the Density Functional Theory (DFT) method. The morphology of the samples was observed by scanning electron microscopy (SEM, SU 8000, Japan) and transmission electron microscopy (TEM, G20, USA). The Raman spectra of samples were obtained by a fully automatic Raman spectrometer at a 532 nm wavelength laser (XPLORA, FRA). Moreover, the zeta potential of materials at different pH values were performed on a micro-electrophoresis apparatus (ZEN1690, UK). The functional groups of materials were evaluated using Fourier-transform infrared (FT-IR) spectroscopy (VERTEX70, Germany). X-ray photoelectron spectroscopy (XPS) was used to analyze the composition of materials (Thermo Instruments Inc, USA).

## Data analysis

SI 1.1: The adsorption amount ( $Q_e$ ) and removal rate (R (%)) of antibiotics were calculated by following equations:<sup>1</sup>

$$Q_t = \frac{(C_o - C_t)V}{m} \quad (1)$$

$$R (\%) = \frac{(C_o - C_t)}{C_o} \times 100\% \quad (2)$$

Where  $Q_t$  (mg/g) is the adsorption amount of adsorbents at time  $t$  (min).  $R$  (%) is the removal rate of OFL and SDZ.  $C_o$  (mg/L) is the initial concentrations of antibiotics and  $C_t$  (mg/L) is the concentrations of antibiotics at  $t$  time (min).  $V$  (mL) is the solution volume and  $m$  (mg) represents the mass of adsorbents.

### SI 1.2: Kinetic modelling

Then the pseudo-first-order kinetic model (Eq. (S1)), pseudo-second-order kinetic model (Eq. (S2)) and intra-particle diffusion model (Eq. (S3)) were used to analyze the experimental data<sup>2, 3</sup>.

$$\ln(Q_e - Q_t) = \ln Q_e - k_1 t \quad (S1)$$

$$\frac{t}{Q_t} = \frac{1}{k_2 Q_e^2} + \frac{t}{Q_e} \quad (S2)$$

$$Q_t = k_d t^{0.5} + C \quad (S3)$$

Where  $t$  is the adsorption time (min),  $Q_e$  and  $Q_t$  (mg/g) are the adsorption amount of antibiotics adsorbed at equilibrium and any time  $t$ , respectively.  $k_1$  ( $\text{min}^{-1}$ ),  $k_2$  ( $\text{g}/(\text{mg}\cdot\text{min})$ ) and  $k_d$  ( $\text{g}/(\text{mg}\cdot\text{h}^{1/2})$ ) are the adsorption rate constant of pseudo-first-order kinetic, pseudo-second-order kinetic and intraparticle diffusion models, respectively. Additionally,  $C$  is the intercept related to the thickness of the boundary layer.

### SI 1.3: Adsorption isotherm modelling

Three isotherm models, Langmuir (Eq. (S4)), Freundlich (Eq. (S5)) and Tempkin (Eq. (S6)) were used to fit the experimental data<sup>3, 4</sup>.

$$\frac{C_e}{Q_e} = \frac{C_e}{Q_{max}} + \frac{1}{Q_{max}K_L} \quad (S4)$$

$$\ln Q_e = \frac{1}{n} \ln C_e + \ln K_F \quad (S5)$$

$$Q_e = K_T \ln C_e + K_T \ln f \quad (S6)$$

Where  $C_e$  is the equilibrium concentration (mg/L),  $Q_e$  is the equilibrium adsorption capacity (mg/g) and  $Q_{max}$  is the antibiotics maximum adsorption capacity (mg/g).  $K_L$  and  $K_F$  are adsorption rate constant of Langmuir and Freundlich models.  $K_T$  is Tempkin constant and  $f$  (L/mg) is Tempkin binding constant, which respectively reflect the adsorption heat and the maximum binding energy.

### SI 1.4: Adsorption thermodynamics

Thermodynamic studies are used to estimate the thermodynamic parameters of antibiotic adsorption behaviour: the change of Gibbs free energy ( $\Delta G$ ), enthalpy ( $\Delta H$ ) and entropy ( $\Delta S$ ).

The thermodynamic parameters were calculated from the following equations<sup>5</sup>:

$$\ln \frac{Q_e}{C_e} = -\frac{\Delta H}{RT} + \frac{\Delta S}{R} \quad (S7)$$

$$\Delta G = \Delta H - T\Delta S \quad (S8)$$

$$K_L = \frac{Q_e}{C_e}$$

Where  $\Delta G$  (kJ/mol) is the Gibbs free energy change,  $\Delta H$  (kJ/mol) is the enthalpy change and  $\Delta S$  (J/(K·mol)) is the entropy change.  $R$  (8.314 J/(K·mol)) represents the gas constant and  $T$  (K) is the absolute temperature.

#### SI 2.1. The alkaline-activation mechanism

Using of KOH as an activator to activate biomass is a general but efficient method for the synthesis of active porous carbon materials with developed porosity. In general, the reaction of carbon with KOH involves the reduction of potassium (K) compounds to form metal K, oxidation of carbon to carbon oxide and carbonate, and the reaction between various active intermediates. The reaction equation can be expressed as follows<sup>6</sup>:

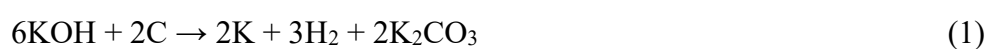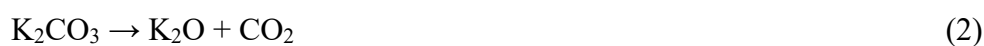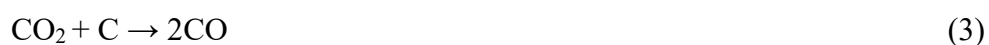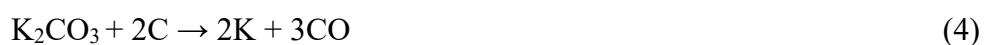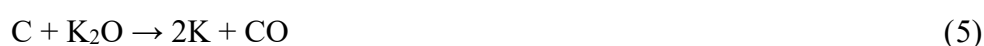

During the KOH activation process, previous results indicated that  $\text{K}_2\text{CO}_3$  formed at about 400 C, and at about 600°C, KOH is completely depleted (Eqn. (1))<sup>7</sup>. The  $\text{K}_2\text{CO}_3$  formed during the reaction decomposes into  $\text{CO}_2$  and  $\text{K}_2\text{O}$  at a temperature exceeds 700°C, and disappears completely at 800°C (Eqn. (2)). From Eqn. (3) we can see that, the resulting  $\text{CO}_2$  can be further reduced by carbon to form CO at high temperature. The compounds of metal K ( $\text{K}_2\text{O}$  and  $\text{K}_2\text{CO}_3$ ) can also be reduced by carbon to form metal K at temperatures exceeding 700°C<sup>8</sup>.

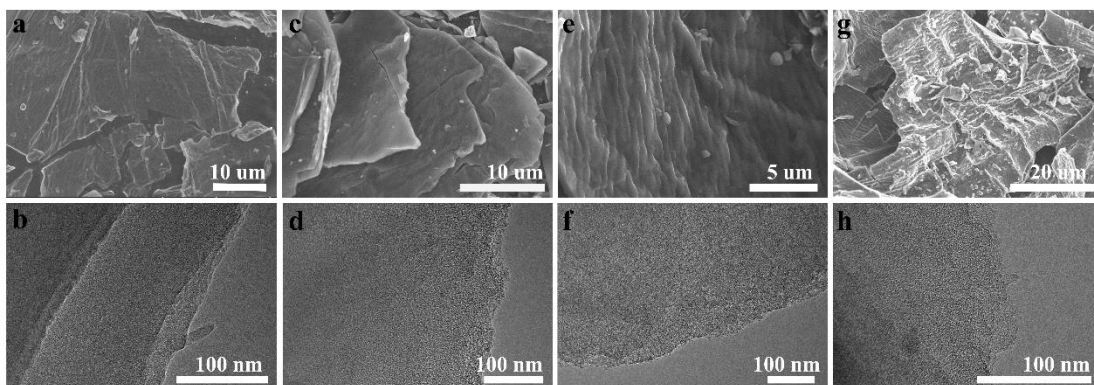

**Fig. S1** SEM and TEM images of samples with different immersion ratios: (a), (b) OPBC; (c), (d) OHPBC-3; (e), (f) OHPBC-4; (g), (h) OHPBC-6.

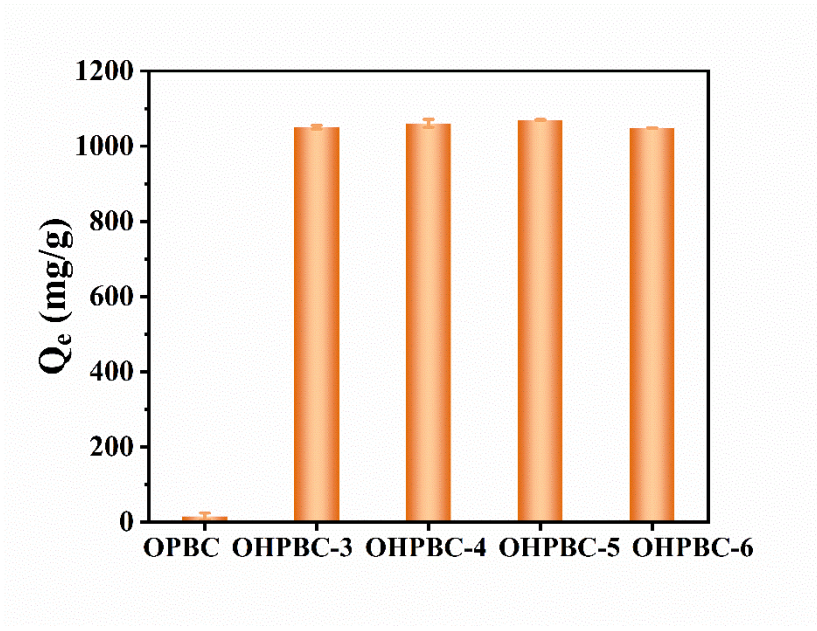

**Fig. S2** The adsorption capacity of ofloxacin (OFL) on OHPBCs and OPBC

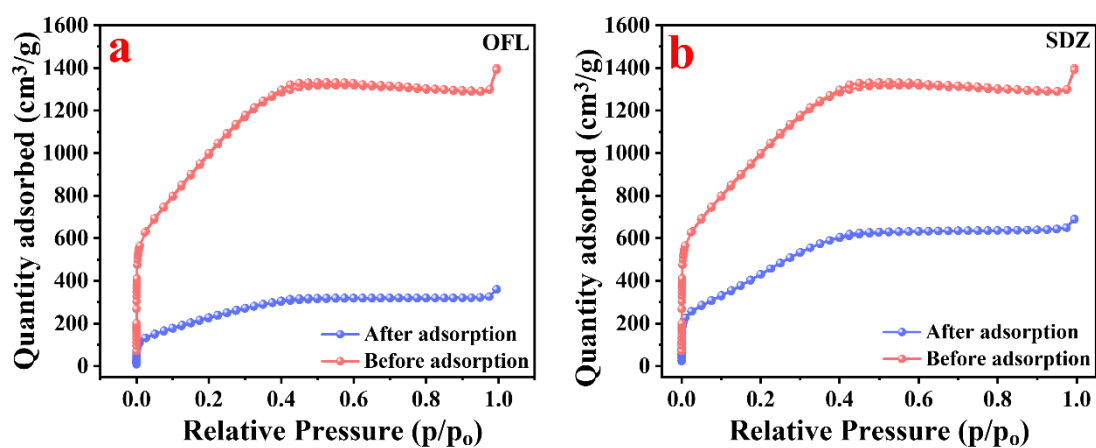

Fig. S3 N<sub>2</sub> adsorption/desorption isotherms before and after (a) LFC and (b) SDZ adsorption onto OHPBC-5.



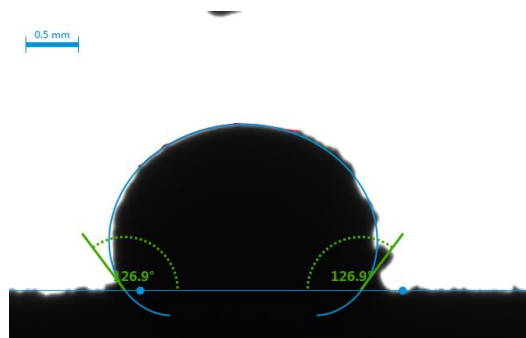

**Fig S4** Contact angle measurement of the OHPBC-5.

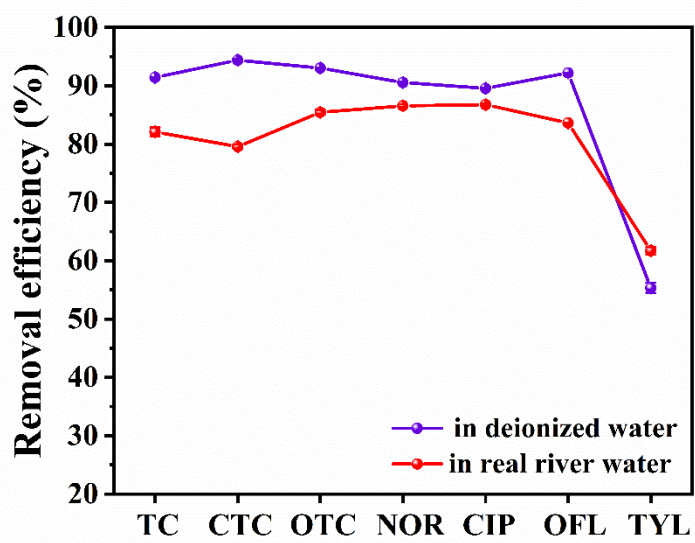

Fig. S5 The removal efficiency of different antibiotics in deionized water and real river water.

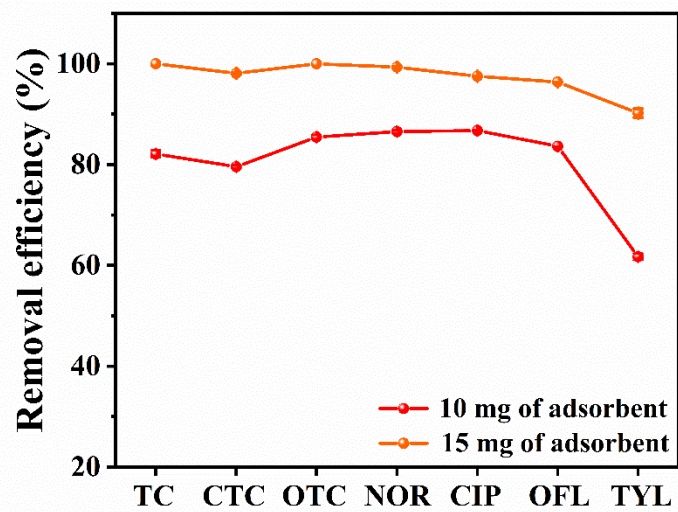

**Fig. S6** Effect of adsorbent dosage on the removal efficiency of different antibiotics in real river water.

**Table S1** Surface areas and pore volume of OPBC and OHPBCs

| Sample                               | OPBC  | OHPBC-3 | OHPBC-4 | OHPBC-5 | OHPBC-6 |
|--------------------------------------|-------|---------|---------|---------|---------|
| S <sub>BET</sub> (m <sup>2</sup> /g) | 137.6 | 2917.4  | 3503.3  | 3787.6  | 3201.4  |
| Pore volume (cm <sup>3</sup> /g)     | 0.071 | 1.31    | 1.54    | 1.95    | 1.82    |

**Table S2** Comparison of adsorption capacity and adsorption time of various adsorbents for OFL and SDZ.

| Adsorbents                                                        | S <sub>BET</sub><br>(m <sup>2</sup> /g) | Q <sub>m</sub><br>(mg/g) | Adsorption conditions                  | Equilibration time<br>(min) | Ref |
|-------------------------------------------------------------------|-----------------------------------------|--------------------------|----------------------------------------|-----------------------------|-----|
| OFL Chitosan/reed biochar composite                               | 141.0                                   | 6.64                     | C <sub>0</sub> =4-20mg/L, 298 K        | 1200                        | 9   |
| Sludge biochar (BTSFe)                                            | 91                                      | 17.9                     | C <sub>0</sub> =30-300 mg/L, 298 K     | 300                         | 10  |
| (Fe/Zn + H <sub>3</sub> PO <sub>4</sub> ) modified sludge biochar | 39.1                                    | 25.4                     | C <sub>0</sub> =5-100 mg/L, 298 K      | 720                         | 11  |
| Loofah sponge-derived activated carbon                            | 834.                                    | 131.93                   | C <sub>0</sub> =20-80 mg/L, 298 K      | 240                         | 12  |
| MIL-101(Cr)-SO <sub>3</sub> H                                     | 1760                                    | 450.4                    | C <sub>0</sub> =20-100 mg/L, 303 K     | 1440                        | 1   |
| ZIF-8                                                             | 650.8                                   | 194.1                    | C <sub>0</sub> =5-100 mg/L, 298 K      | 120                         | 13  |
| SDZ glucose-based mesoporous carbon                               | 1126.5                                  | 246.73                   | C <sub>0</sub> =10-100 mg/L, 308K      | 120                         | 14  |
| cotton shells biochar                                             | 1225.6                                  | 86.89                    | C <sub>0</sub> =10-100 mg/L, 298K      | 720                         | 15  |
| Olive pomace-derived biochar                                      | 2451.8                                  | 66.2252                  | C <sub>0</sub> =5-50 mg/L, 298 k       | 120                         | 16  |
| Amino-functionalized porous carbon                                | 1164                                    | 90.7                     | C <sub>0</sub> =1-20 mg/L, 298K        | 720                         | 17  |
| Pinewood-derived porous biochar                                   | 738                                     | 261                      | C <sub>0</sub> =6-48 mg/L, 298 K       | 2880                        | 18  |
| hydroxylated multi - walled carbon nanotubes                      | 105.07                                  | 132.334                  | C <sub>0</sub> =10-100 mg/L,298 K      | 20                          | 19  |
| OFL <b>This study (OHPBC-5)</b>                                   | <b>3787.6</b>                           | <b>1134.76</b>           | <b>C<sub>0</sub>=10-60 mg/L, 298 K</b> | <b>10</b>                   |     |
| SDZ <b>This study (OHPBC-5)</b>                                   | <b>3787.6</b>                           | <b>1281.25</b>           | <b>C<sub>0</sub>=10-60 mg/L, 298 K</b> | <b>10</b>                   |     |

**Table S3** Kinetic parameters for the adsorption of OFL and SDZ onto the OHPBC-5

| Kinetic model                  |        | Parameters                 | OFL                   |                       |                       | SDZ                   |                       |                       |
|--------------------------------|--------|----------------------------|-----------------------|-----------------------|-----------------------|-----------------------|-----------------------|-----------------------|
|                                |        |                            | 20 mg/L               | 30 mg/L               | 40 mg/L               | 20 mg/L               | 30 mg/L               | 40 mg/L               |
| Pseudo-first-order             |        | $k_1$                      | 0.189                 | 0.291                 | 0.248                 | 0.298                 | 0.218                 | 0.284                 |
|                                |        | $R^2$                      | 0.974                 | 0.972                 | 0.976                 | 0.966                 | 0.962                 | 0.878                 |
| Pseudo-second-order            |        | $Q_{exp}$                  | 911.448               | 1058.097              | 1123.092              | 732.813               | 914.882               | 1048.528              |
|                                |        | (mg/g)                     |                       |                       |                       |                       |                       |                       |
|                                |        | $Q_{cal}$                  | 925.93                | 1080.83               | 1137.73               | 740.74                | 925.93                | 1065.65               |
|                                |        | (mg/g)                     |                       |                       |                       |                       |                       |                       |
|                                |        | $k_2$                      | $2.05 \times 10^{-3}$ | $2.28 \times 10^{-3}$ | $3.34 \times 10^{-3}$ | $4.38 \times 10^{-3}$ | $3.73 \times 10^{-3}$ | $3.71 \times 10^{-3}$ |
|                                | (g/mg) |                            |                       |                       |                       |                       |                       |                       |
|                                |        | $R^2$                      | 0.999                 | 0.999                 | 0.999                 | 0.999                 | 0.999                 | 0.999                 |
| Intra-particle diffusion model | Step1  | $k_{d,1}$                  | 179.94                | 252.38                | 187.94                | 117.57                | 139.39                | 181.55                |
|                                |        | ( $mg/(g \cdot h^{1/2})$ ) |                       |                       |                       |                       |                       |                       |
|                                |        | $C_1$                      | 468.95                | 533.61                | 736.59                | 460.81                | 610.90                | 671.89                |
|                                |        | $R^2$                      | 0.987                 | 0.987                 | 0.950                 | 0.998                 | 0.976                 | 0.996                 |
|                                | Step2  | $k_{d,2}$                  | 83.46                 | 27.95                 | 38.14                 | 42.50                 | 45.03                 | 71.12                 |
|                                |        | ( $mg/(g \cdot h^{1/2})$ ) |                       |                       |                       |                       |                       |                       |
|                                |        | $C_2$                      | 634.88                | 932.59                | 994.84                | 596.62                | 775.88                | 865.32                |
|                                |        | $R^2$                      | 0.995                 | 0.878                 | 0.987                 | 0.972                 | 0.977                 | 0.949                 |
|                                | Step3  | $k_{d,3}$                  | 23.78                 | 12.46                 | 8.66                  | 7.73                  | 13.29                 | 0.74                  |
|                                |        | ( $mg/(g \cdot h^{1/2})$ ) |                       |                       |                       |                       |                       |                       |
|                                |        | $C_3$                      | 806.28                | 1002.52               | 1085.3                | 697.21                | 857.25                | 1045.24               |
|                                |        | $R^2$                      | 0.975                 | 0.953                 | 0.941                 | 0.927                 | 0.977                 | 0.935                 |

**Table S4** Fitting parameters of three isotherm models for OFL and SDZ adsorption onto OHPBC-5.

| Adsorbates | Langmuir                       |                                    |       | Freundlich |      |       | Tempkin                        |       |       |
|------------|--------------------------------|------------------------------------|-------|------------|------|-------|--------------------------------|-------|-------|
|            | $K_L$<br>( $L \cdot mg^{-1}$ ) | $Q_{max}$<br>( $mg \cdot g^{-1}$ ) | $R^2$ | $K_F$      | $n$  | $R^2$ | $K_T$<br>( $L \cdot mg^{-1}$ ) | $f$   | $R^2$ |
| OFL        | 1.91                           | 1134.76                            | 0.995 | 625.9      | 4.53 | 0.925 | 175.24                         | 42.52 | 0.98  |
| SDZ        | 0.30                           | 1281.25                            | 0.997 | 382.36     | 2.96 | 0.97  | 247.54                         | 3.42  | 0.99  |

**Table S5** Thermodynamic parameters for OFL and SDZ adsorption on OHPBC-5.

| Antibiotics | T (K) | $K_L$  | $\Delta G$ (kJ/mol) | $\Delta H$ (kJ/mol) | $\Delta S$ (J/(K·mol)) |
|-------------|-------|--------|---------------------|---------------------|------------------------|
| OFL         | 298   | 289.11 | -14.03              | -5.37               | 29.2                   |
|             | 308   | 274.84 | -14.38              |                     |                        |
|             | 318   | 252.64 | -14.63              |                     |                        |
| SDZ         | 298   | 120.83 | -11.88              | -25.09              | -44.31                 |
|             | 308   | 88.55  | -11.45              |                     |                        |
|             | 318   | 62.08  | -10.98              |                     |                        |



**Table S6** Physiochemical properties of the studied OFL and SDZ.

|     | Formula                                                         | Structure                                                                         | pK <sub>a1</sub> | pK <sub>a2</sub> | Molecular weight | Ref. |
|-----|-----------------------------------------------------------------|-----------------------------------------------------------------------------------|------------------|------------------|------------------|------|
| OFL | C <sub>18</sub> H <sub>20</sub> FN <sub>3</sub> O <sub>4</sub>  | 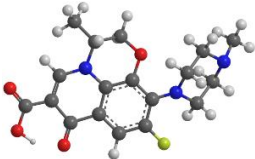 | 6.08             | 8.28             | 361.37           | 20   |
| SDZ | C <sub>10</sub> H <sub>10</sub> N <sub>4</sub> O <sub>2</sub> S |  | 1.57             | 6.5              | 250.28           | 21   |

**Table S7** The XPS element analysis of OHPBC-5 before and after adsorption.

| Samples     |       |       |       |       |       | C 1s (%) |      |      |
|-------------|-------|-------|-------|-------|-------|----------|------|------|
|             | C (%) | O (%) | N (%) | F (%) | S (%) | C-C/C=C  | C-O  | C=O  |
| OHPBC-5     | 6.3   | 93.02 |       |       |       | 0.56     | 0.25 | 0.19 |
| OFL-OHPBC-5 | 10.01 | 85.52 | 3.3   | 1.18  |       | 0.52     | 0.37 | 0.11 |
| SDZ-OHPBC-5 | 7.53  | 85.64 | 5.51  |       | 1.32  | 0.51     | 0.29 | 0.20 |

**Table S8** Changes of specific surface area and pore volume of OHPBC-5 before and after adsorption.

| Sample                               | After adsorption of OFL | After adsorption of SDZ |
|--------------------------------------|-------------------------|-------------------------|
| S <sub>BET</sub> (m <sup>2</sup> /g) | 893.1                   | 1843.4                  |
| Pore volume (cm <sup>3</sup> /g)     | 0.45                    | 0.91                    |

## References

1. X. Y. Guo, C. F. Kang, H. L. Huang, Y. J. Chang and C. L. Zhong, *Micropor. Mesopor. Mat.*, 2019, **286**, 84-91.
2. H. T. Fan, W. Sun, B. Jiang, Q. J. Wang, D. W. Li, C. C. Huang, K. J. Wang, Z. G. Zhang and W. X. Li, *Chem. Eng. J.*, 2016, **286**, 128-138..
3. C. H. Liang, X. D. Zhang, P. Feng, H. X. Chai and Y. M. Huang, *Chem. Eng. J.*, 2018, **344**, 95-104.
4. H. M. Jang, S. Yoo, Y. K. Choi, S. Park and E. Kan, *Bioresour. Technol.*, 2018, **259**, 24-31.
5. Z. H. Yang, J. Cao, Y. P. Chen, X. Li, W. P. Xiong, Y. Y. Zhou, C. Y. Zhou, R. Xu and Y. R. Zhang, *Micropor. Mesopor. Mat.*, 2019, **277**, 277-285.
6. J. Wang and S. Kaskel, *J. Mater. Chem.*, 2012, **22**, 23710-23725.
7. E. Raymundo-Piñero, P. Azaïs, T. Cacciaguerra, D. Cazorla-Amorós, A. Linares-Solano and F. Béguin, *Carbon.*, 2005, **43**, 786-795.
8. G. Singh, K. S. Lakhi, S. Sil, S. V. Bhosale, I. Kim, K. Albahily and A. Vinu, *Carbon.*, 2019, **148**, 164-186.
9. C. Zhu, Y. Lang, B. Liu and H. Zhao, *Polycycl. Aromat. Comp.*, 2018, **39**, 287-297.
10. V. Singh and V. C. Srivastava, *Environ. Pollut.*, 2020, **259**, 113822.
11. Y. F. Ma, P. Li, L. Yang, L. Wu, L. Y. He, F. Gao, X. B. Qi and Z. L. Zhang, *Ecotox. Environ. Safe.*, 2020, **196**, 110550.
12. Q. Kong, X. He, L. Shu and M. S. Miao, *Process Saf. Environ.*, 2017, **112**, 254-

264..

13. R. B. Yu and Z. C. Wu, *Micropor. Mesopor. Mat.*, 2020, **308**, 110494.
14. B. Wang, X. Y. Xu, H. Tang, Y. L. Mao, H. H. Chen and F. Y. Ji, *Appl. Surf. Sci.*, 2020, **528**, 147048.
15. Q. M. Meng, Y. L. Zhang, D. Meng, X. P. Liu, Z. J. Zhang, P. L. Gao, A. G. Lin and L. Hou, *Environ. Res.*, 2020, **191**, 110104.
16. S. Aslan and M. Şirazi, *Water. Air. Soil. Poll.*, 2020, **231**, 222.
17. Y. Wang, W. B. Jiao, J. T. Wang, G. F. Liu, H. L. Cao and J. Lu, *Bioresour. Technol.*, 2019, **277**, 128-135.
18. C. Y. Li, X. X. Zhu, H. L. He, Y. X. Fang, H. P. Dong, J. H. Lü, J. F. Li and Y. M. Li, *J. Mol. Liq.*, 2019, **274**, 353-361.
19. Y. B. Liu, Y. L. Peng, B. H. An, L. C. Li and Y. Liu, *Chemosphere.*, 2020, **246**, 125778.
20. R. S. Bangari and N. Sinha, *J. Mol. Liq.*, 2019, **293**, 111376.
21. M. Jiang, W. B. Yang, Z. W. Zhang, Z. Yang and Y. P. Wang, *J. Environ. Sci.*, 2015, **31**, 226-234.
